# Supplementary material
Source: PubMed Central journal article supplement (PMC5419850)
Supplement: NIHMS841902-supplement-1.pdf [file NIHMS841902-supplement-1.pdf]

## Inventory of Supplemental Information

### Supplementary Figures:

**Figure S1.** *GATA6* and *GATA4* mutant hPSC clones, pancreatic progenitor marker analysis, and *GATA6* mutant characterization. Related to Figures 2, 3 and 6.

**Figure S2.** *GATA6* and *GATA4* expression during hPSC differentiation using the 2nd-generation protocol. Related to Figure 4.

**Figure S3.** *GATA6* haploinsufficiency in PP2 specification. Related to Figure 4.

**Figure S4.** *GATA6* haploinsufficiency in the formation of  $\beta$ -like cell. Related to Figure 5.

**Figure S5.** *GATA6* heterozygous mutations in humans. Related to Figure 6.

**Figure S6.** Genetic interaction of *GATA4* and *GATA6* in the specification of definitive endoderm cells and pancreatic progenitors. Related to Figure 6.

### Supplementary Tables:

**Table S1.** Summary of CRISPR targeting sequences and oligonucleotides used for targeting experiments. Related to Figure 2.

**Table S2.** Summary of *GATA6/4* mutant lines investigated. Related to Figures 2-6.

**Table S3.** hPSC differentiation into glucose-responsive  $\beta$ -like cells. Related to Figures 4-6.

**Table S4.** *GATA6* heterozygous mutations reported in humans. Related to Figure 6.

**Table S5.** Primers for RT-qPCR. Related to Figures 1, 4.

Shi\_Supplementary Figure 1

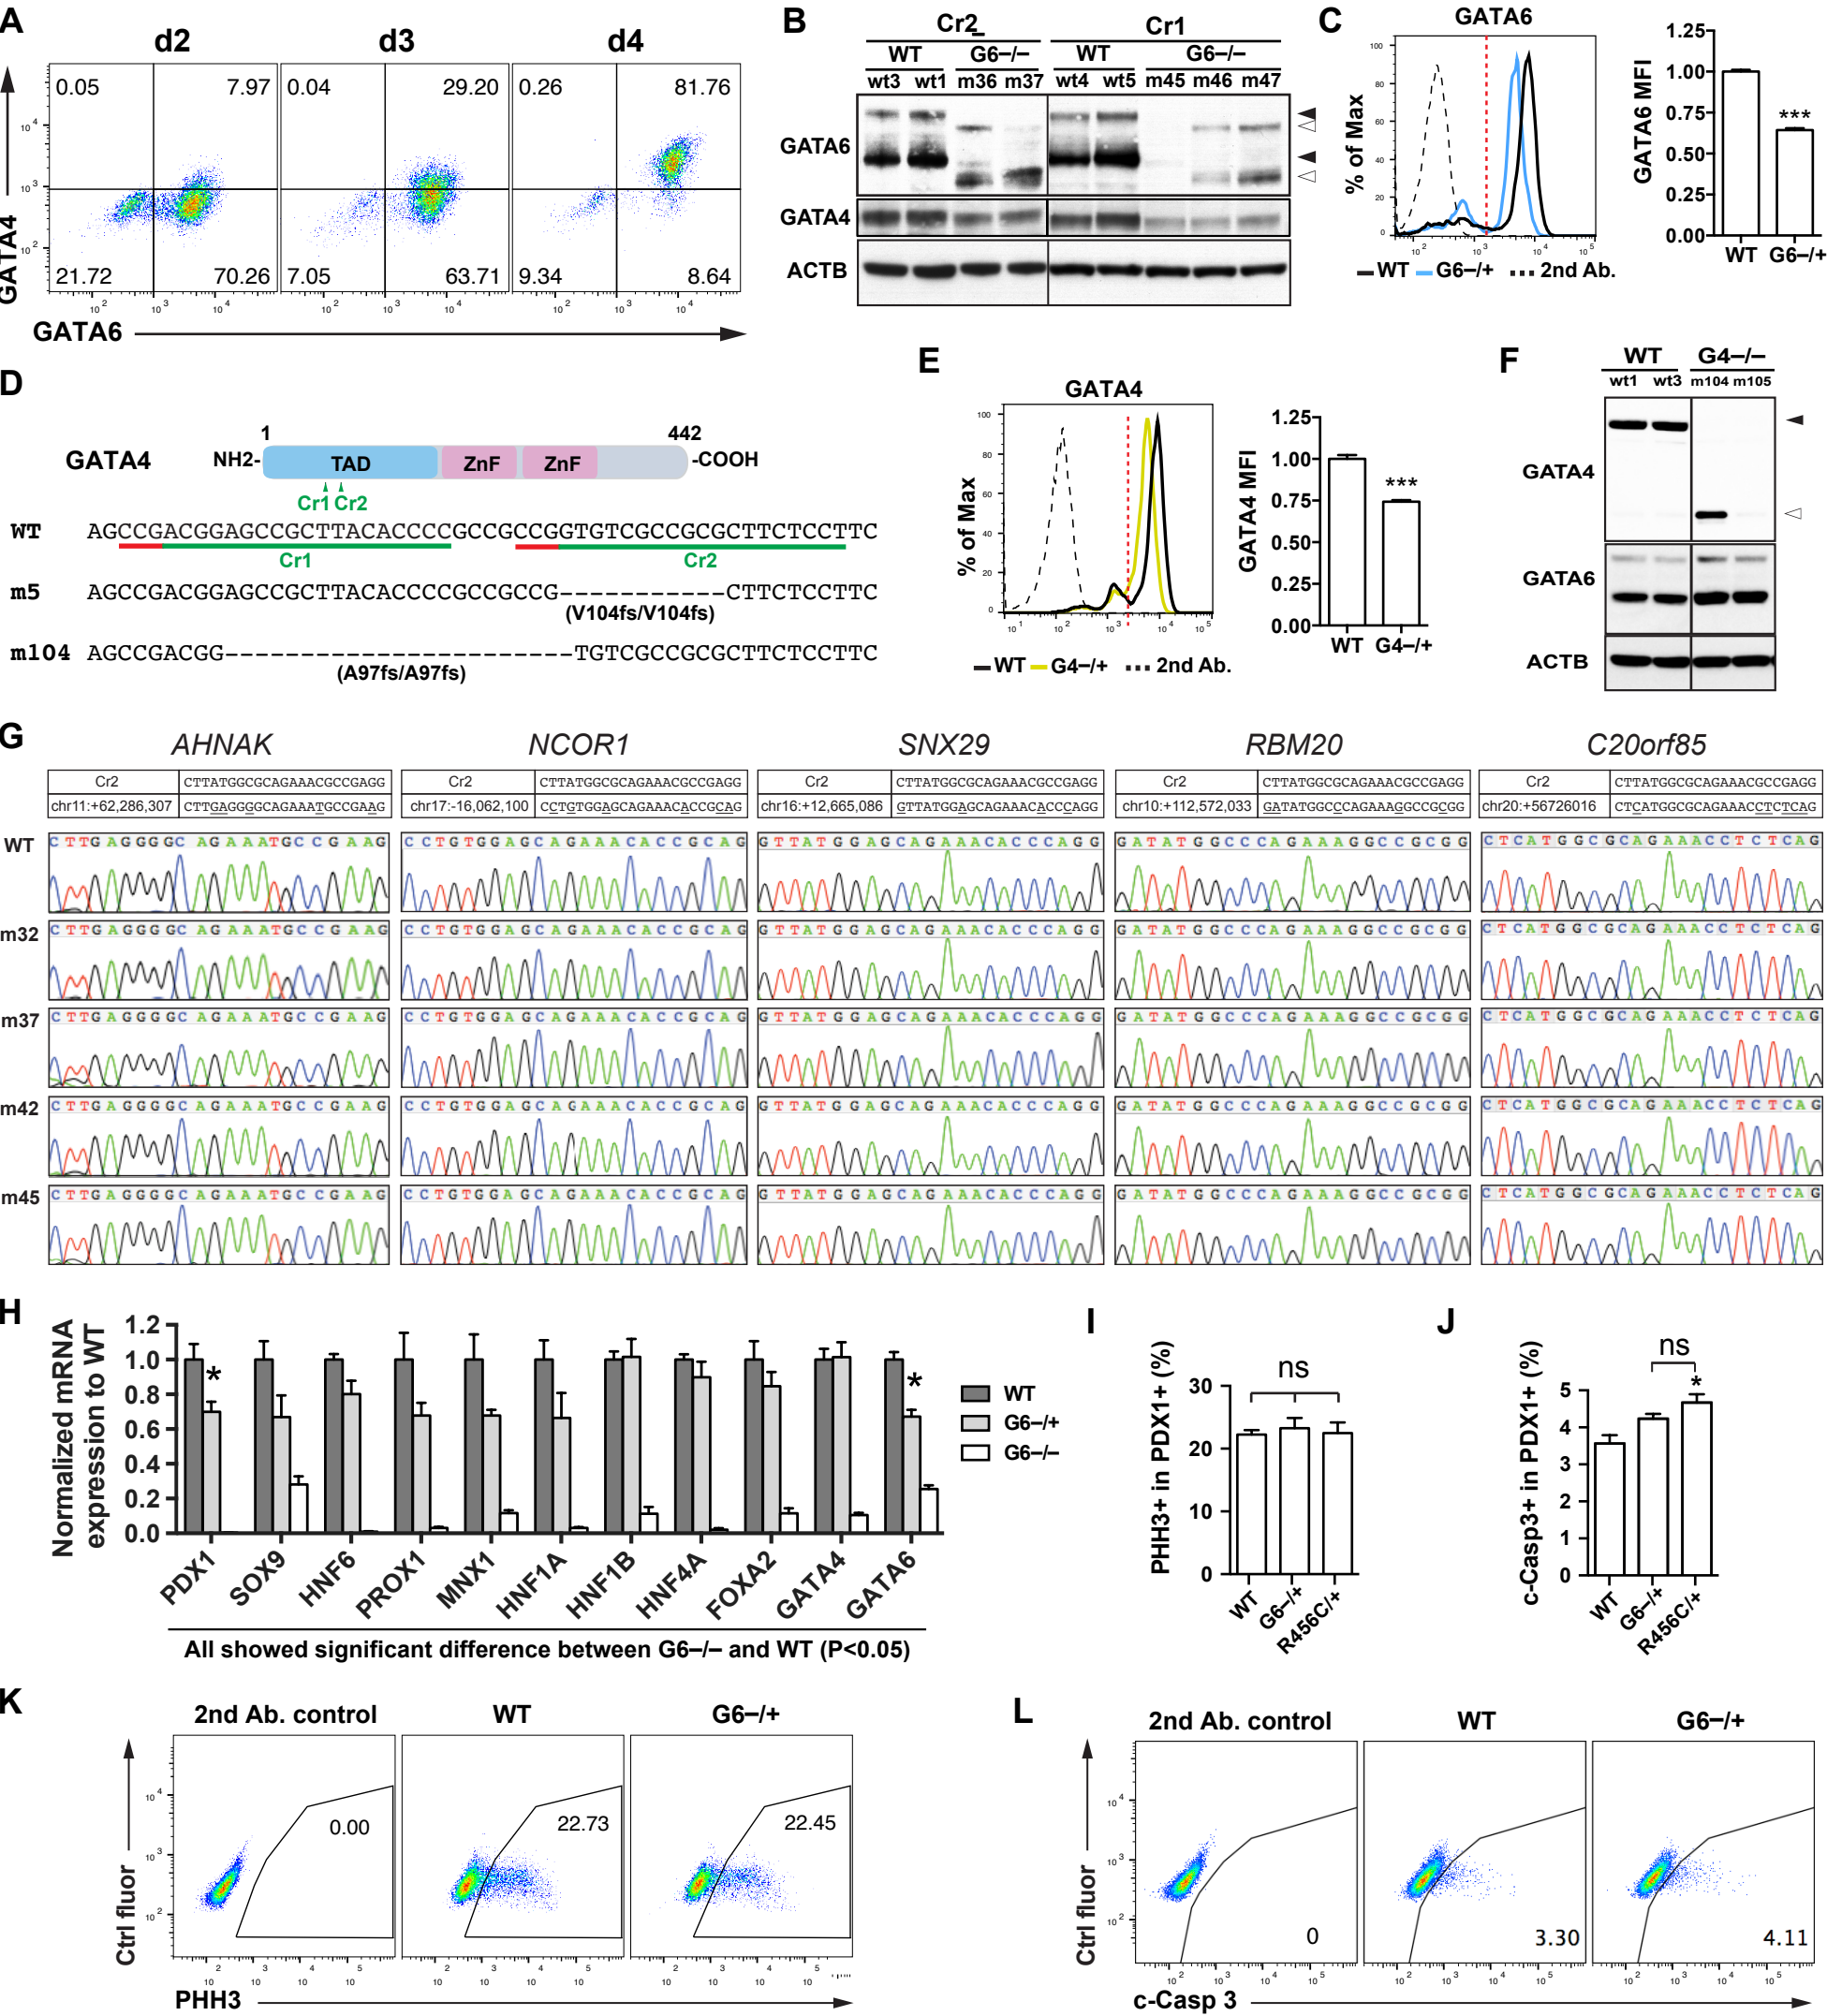

**Figure S1. *GATA6* and *GATA4* mutant hPSC clones, pancreatic progenitor marker analysis, and *GATA6* mutant characterization. Related to Figures 2, 3 and 6.**

- (A) Time course study for emergence of *GATA6*<sup>+</sup> cells and *GATA4*<sup>+</sup> cells during DE differentiation. *GATA6*<sup>+</sup> cells appeared earlier than *GATA4*<sup>+</sup> cells and *GATA4*<sup>+</sup> cells always express *GATA6*.
- (B) *GATA6* mutant cells were differentiated to DE stage and collected for Western blotting to detect *GATA6* and *GATA4* proteins. *GATA4* expression was reduced in *GATA6*<sup>-/-</sup> cells. Solid arrowheads indicate the wild-type *GATA6* protein isoforms. Unfilled arrowheads indicate truncated *GATA6* proteins from mutant cells.
- (C) Representative FACS histograms and median fluorescence intensity (MFI) quantification for *GATA6*<sup>-/+</sup> mutants at the DE stage stained with the *GATA6* antibody (n=12).
- (D) Generation of *GATA4* mutants. Two CRISPR gRNAs (*GATA4*-Cr1 and Cr2) were used for generating *GATA4* mutant clones. Sequences for two representative homozygous mutants (m5 and m104) with frameshift mutations were shown.
- (E) The cells were differentiated to DE stage and processed for FACS analysis. Representative FACS histograms MFI quantification for *GATA4*<sup>-/+</sup> mutants stained with the *GATA4* antibody (n=7).
- (F) The cells were differentiated to DE stage and collected for Western blotting to detect *GATA4* and *GATA6* proteins. *GATA6* expression was slightly increased in *GATA4*<sup>-/-</sup> lines. The solid arrowhead indicates WT *GATA4* protein, and the unfilled arrowhead indicates the truncated *GATA4* proteins from the mutant allele.
- (G) Potential off-target analysis for *GATA6* mutant clones. Sequencing results from the top 5 potential off-target exomic regions identified using an online tool (crispr.mit.edu).

- (H) RT-qPCR measurement of expression of PP1 pancreatic progenitor markers. The level of mRNA expression of each gene was normalized to its expression in the WT controls (n=4).
- (I) Quantification of FACS analysis of PHH3+ cells for WT, *GATA6*<sup>-/+</sup> and *GATA6*<sup>R456C/+</sup> lines (n=6). Note that ns indicates not statistically significant throughout.
- (J) Quantification of FACS analysis of cleaved caspase3+ cells for WT, *GATA6*<sup>-/+</sup> and *GATA6*<sup>R456C/+</sup> lines (n=4).
- (K) Representative FACS dot plots for PHH3+ cells in the PDX1+ cell population.  
PHH3: Phospho-Histone H3, a proliferation marker. 2nd Ab.: controls stained with only the secondary antibody. The PDX1+ cell population was first gated and then PHH3+ cell population was gated within the PDX1+ cell population.
- (L) Representative FACS dot plots for cleaved Caspase-3+ (c-Casp3+) cells in the PDX1+ cell population. The analysis was done in the same way as for PHH3.

All data in this figure were generated from HUES8 lines using the 1st-generation differentiation protocol.

Shi\_Supplementary Figure 2

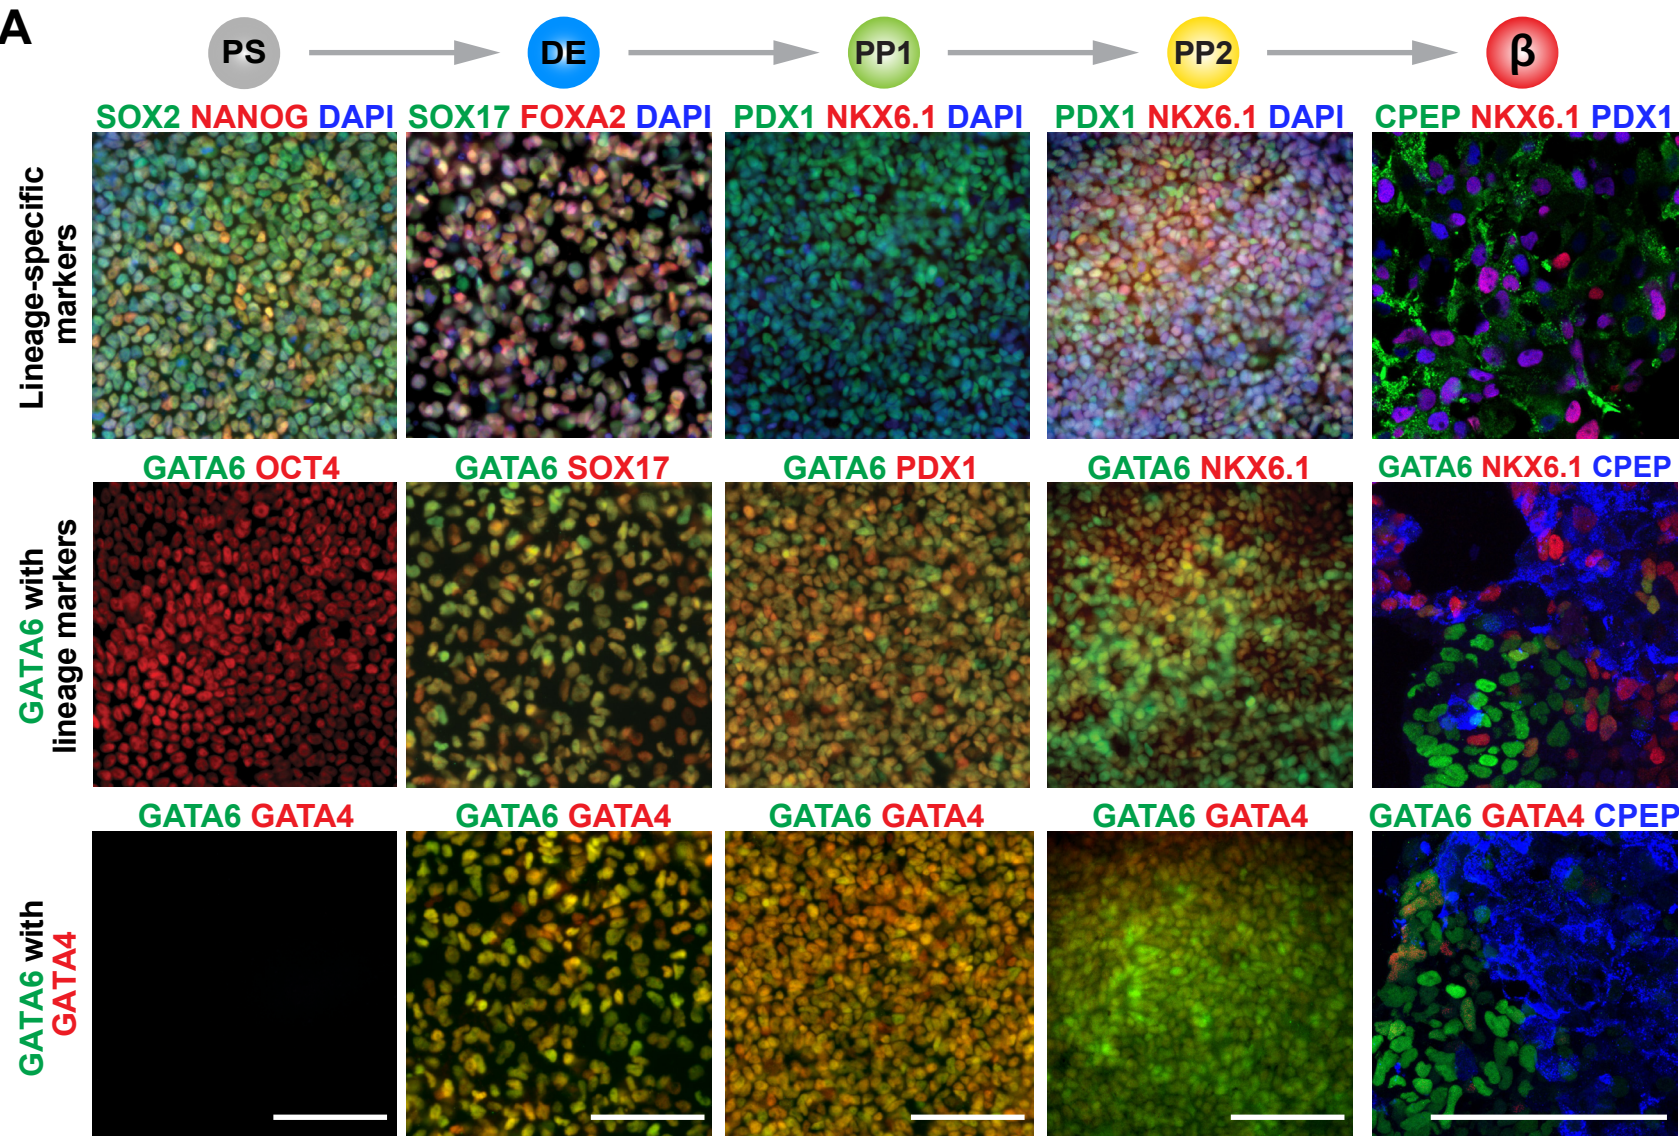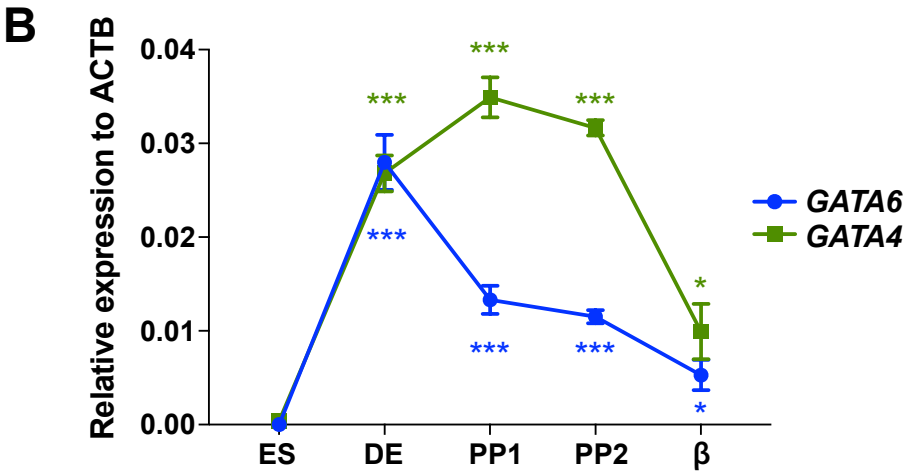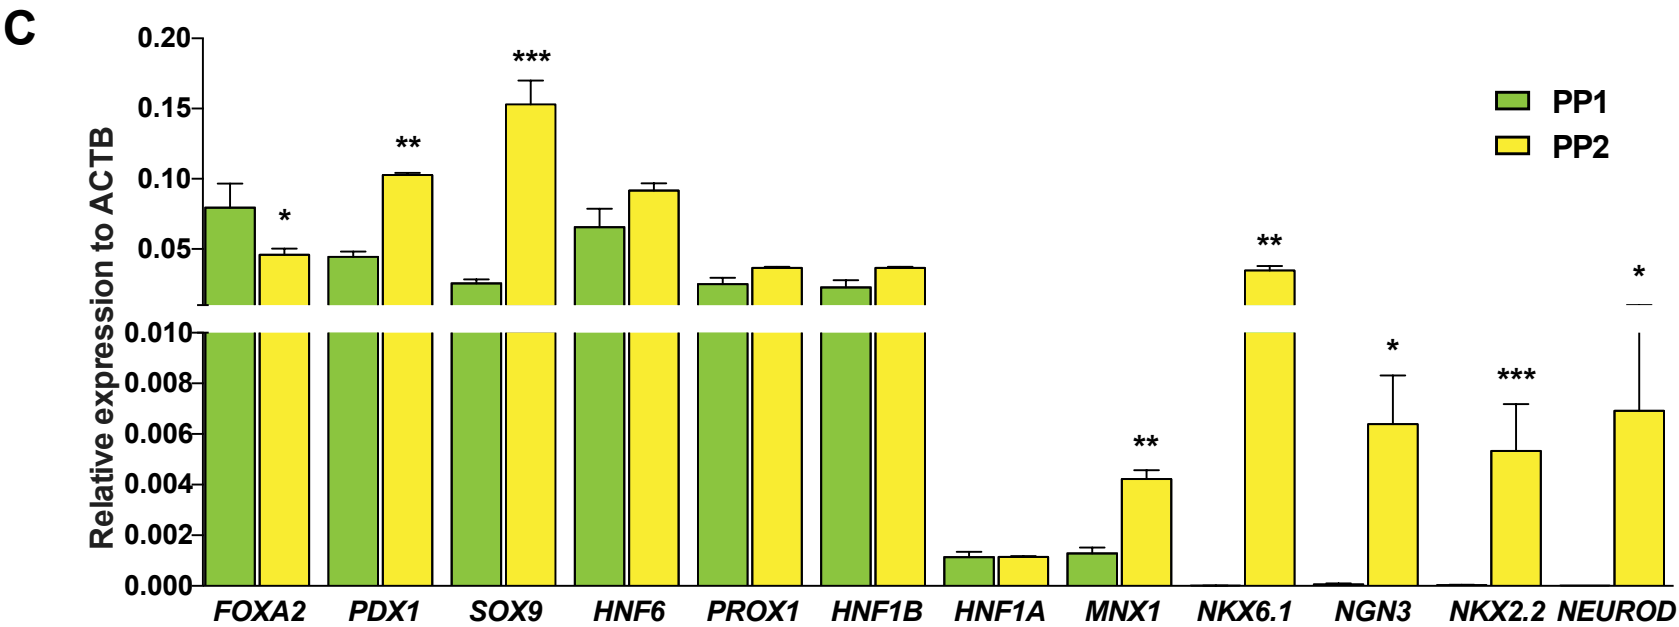

**Figure S2. GATA6 and GATA4 expression during hPSC differentiation using the 2nd-generation protocol. Related to Figure 4.**

- (A) Representative immunostaining of key markers at each stage (first row), GATA6 co-staining with lineage markers (second row), or GATA4 (third row). Scale bar is 100  $\mu$ m for all images. The immunostaining showed co-expression of GATA4 and GATA6 at both PP1 and PP2 stages, with a significant decrease in GATA4 expression level at the PP2 compared to the PP1 stage.
- (B) GATA6/4 mRNA expression at each differentiation stage. The expression levels were normalized to the internal control *ACTB*. t-test with two-tailed distribution was used to determine the significance (n=3).
- (C) Pancreatic progenitor marker expression at PP1 and PP2 stages. The expression levels were normalized to the internal control *ACTB*. Paired T-test with two-tailed distribution was used to determine the significance (n=3).

All data in this figure were generated from H1 lines using the 2nd-generation differentiation protocol.

Shi\_Supplementary Figure 3

A

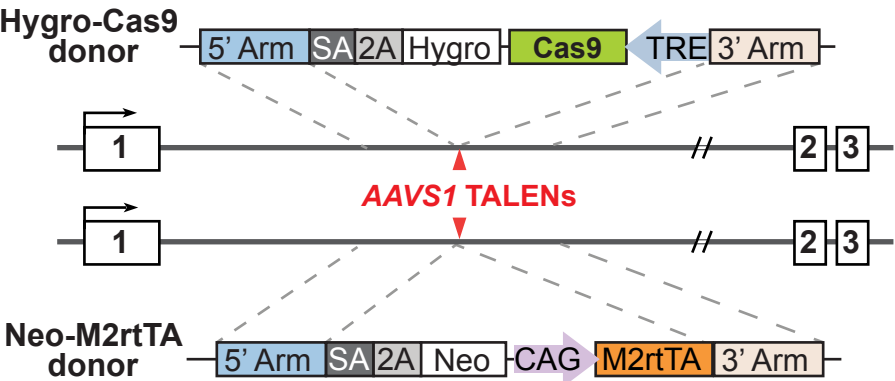

B

DE

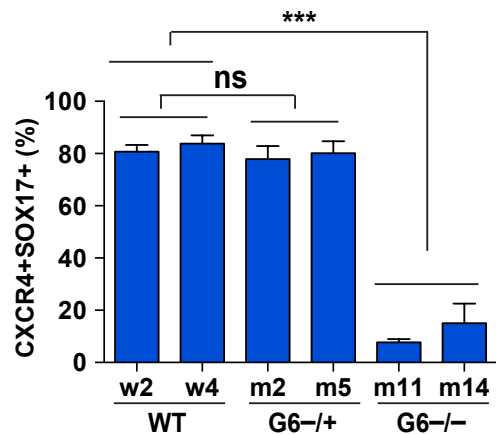

C

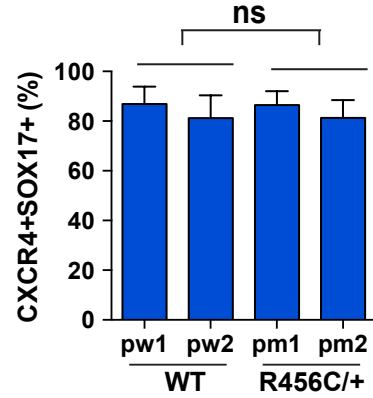

D

PP1

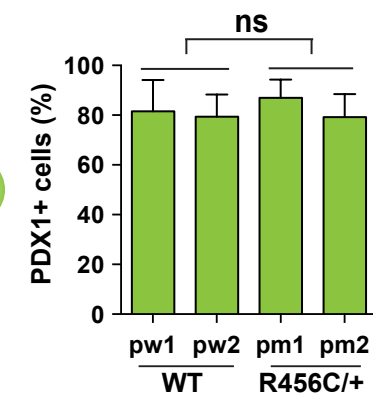

E

PP2

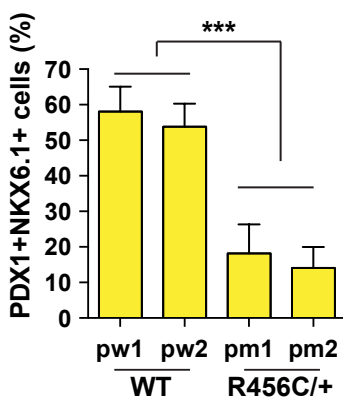

F

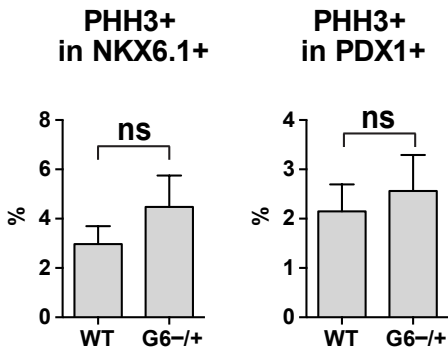

G

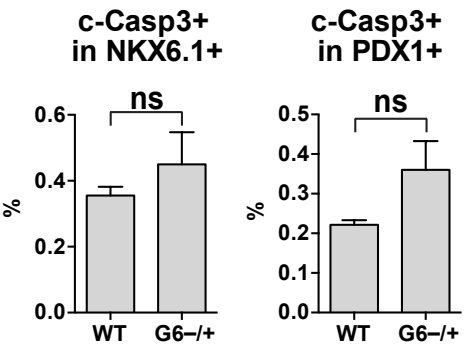

H

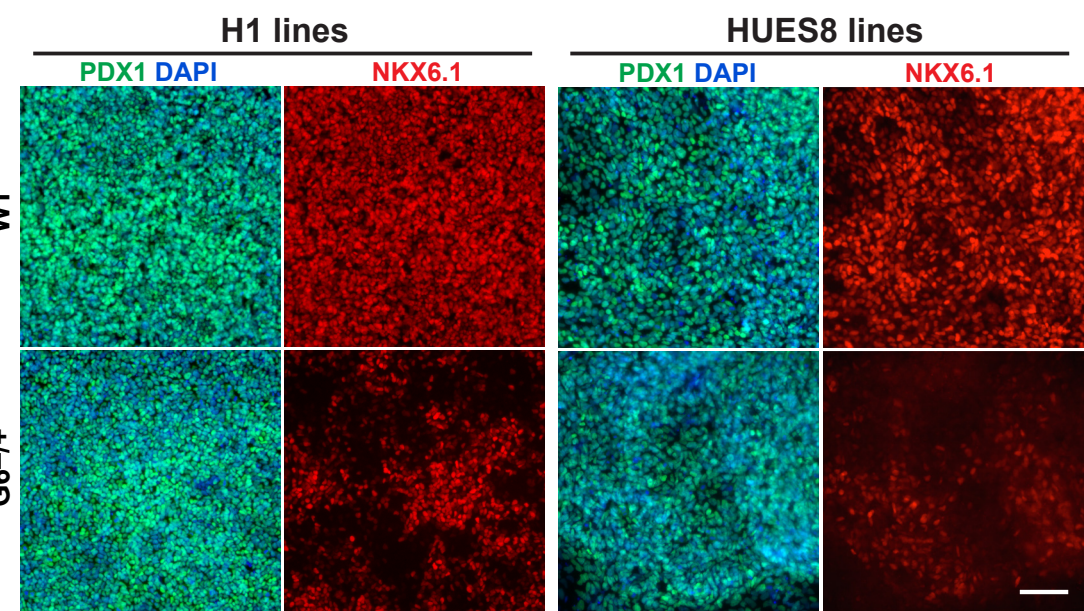

I

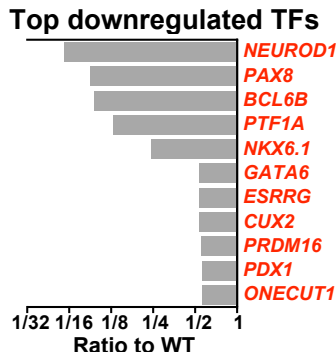

J

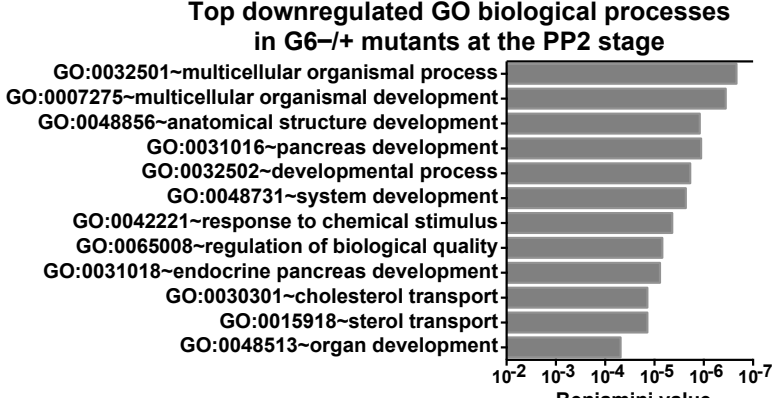

**Figure S3. GATA6 haploinsufficiency in PP2 specification. Related to Figure 4.**

- (A) Generation of H1 iCas9 hPSC lines through TALEN-mediated gene targeting at the *AAVS1* locus. SA, splice acceptor; 2A, self-cleaving 2A peptide; Neo, neomycin resistance gene; CAG, constitutive synthetic promoter; M2rtTA, reverse tetracycline-controlled transactivator sequence; Hygro, hygromycin resistance gene; TRE, tetracycline response element. Hygro-Cas9 plasmid was established by cloning Cas9 into the Hygro-iDEST vector (Addgene #75339). Information for the *AAVS1* TALENs and Neo-M2rtTA plasmids can be found in Addgene (#59025, 59026 and 60843).
- (B) FACS quantification of CXCR4+SOX17+ cell percentage at DE stage. WT lines are w2 and w4, *GATA6*<sup>-/+</sup> mutant lines are m2 and m5, and *GATA6*<sup>-/-</sup> lines are m11 and m14, in which w2, m2 and m11 were picked from *GATA6*-Cr1 targeting and w4, m5 and m14 were picked from *GATA6*-Cr2 targeting. *GATA6*<sup>-/+</sup> mutant group is not significantly (ns) different compared to the WT group but the *GATA6*<sup>-/-</sup> mutant group is significantly different from the WT group (n=4-12).
- (C) FACS quantification of CXCR4+SOX17+ cell percentage at DE stage for disease-mimicking H1 hPSC lines. WT lines are pw1 and pw2, *GATA6*<sup>R456C/+</sup> mutant lines are pm1 and pm2 (ns, not significant. n=6).
- (D) FACS quantification of PDX1+ cell percentage at PP1 stage for disease-mimicking H1 hPSC lines (ns, not significant. n=6).
- (E) Quantification and analysis of PDX1+NKX6.1+ cells stage for disease-mimicking lines based on FACS analysis from 3 independent experiments. The lines with the same genotypes were treated as one group (n=6).
- (F) Percentage of PHH3+ cells within NKX6.1+ cells or PDX1+ cells (n=6).
- (G) Percentage of cleaved caspase3 (c-Casp3)+ cells within NKX6.1+ cells or PDX1+ cells (n=6).

- (H) Immunostaining shows *GATA6*<sup>-/+</sup> lines (both H1 and HUES8 lines) showed impaired specification of PDX1+NKX6.1+ PP2 cells.
- (I) Top downregulated transcription factors (TFs) in *GATA6*<sup>-/+</sup> mutants at the PP2 stage based on RNA-seq analysis.
- (J) Top downregulated biological process gene ontology (GO) analysis in *GATA6*<sup>-/+</sup> mutants at the PP2 stage.

All data in this figure were generated using the 2nd-generation differentiation protocol from H1 lines, except that S3H contains data from both H1 and HUES8 lines as indicated.

# Shi\_Supplementary Figure 4

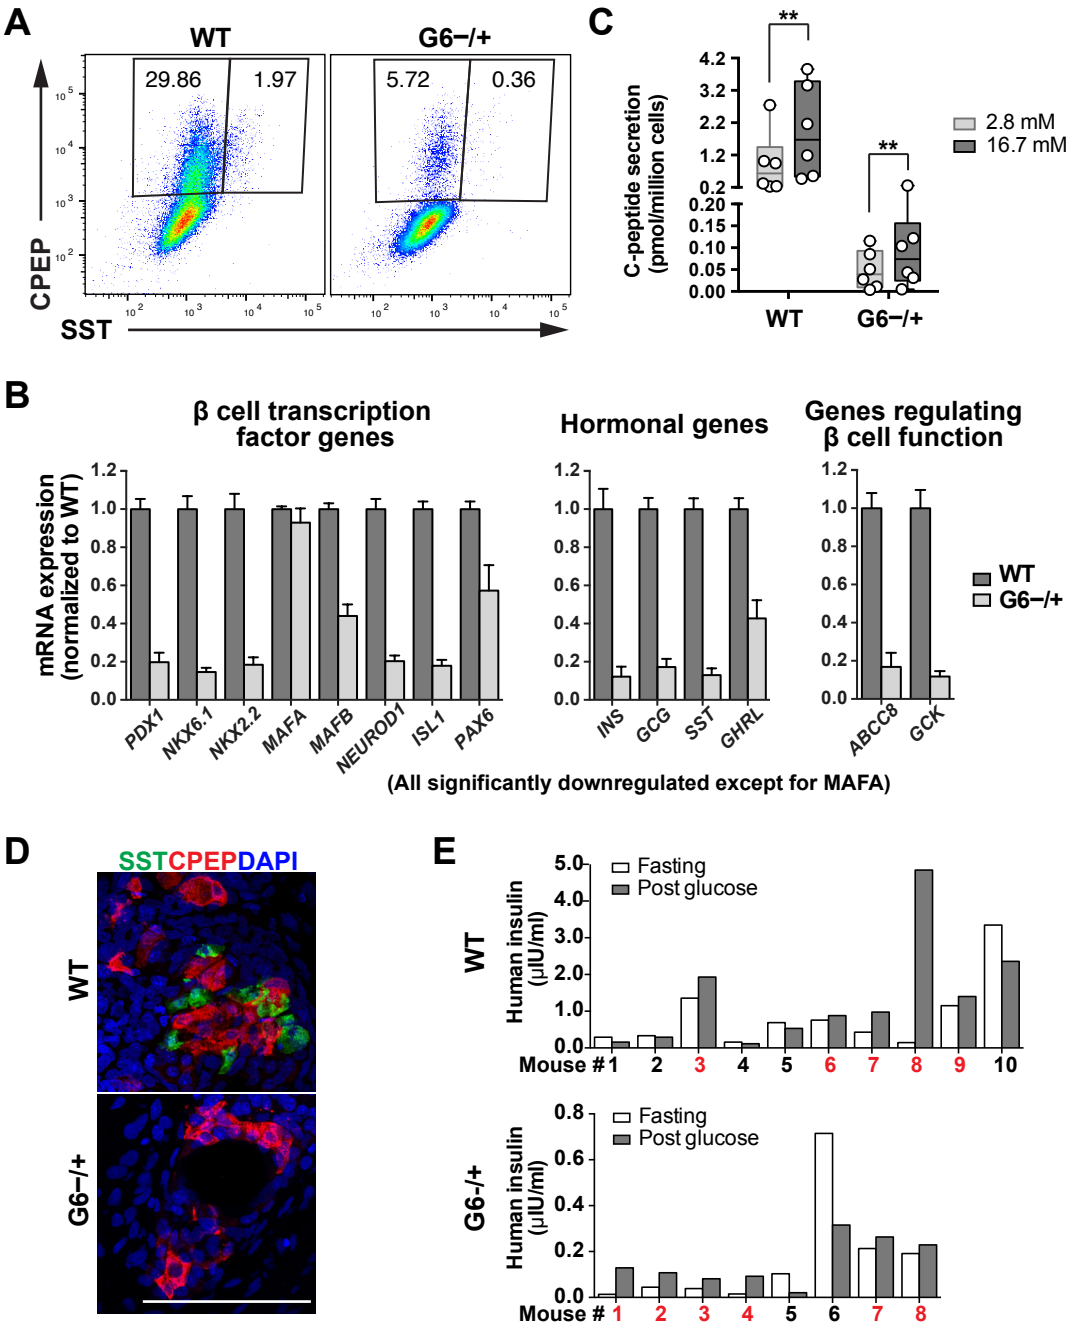

**Figure S4. GATA6 haploinsufficiency in the formation of  $\beta$ -like cell. Related to Figure 5.**

- (A) Representative FACS plots for CPEP and SST (somatostatin) intracellular staining at  $\beta$ -like stage.
- (B) RT-qPCR analysis of expression of  $\beta$  cell transcription factors, hormonal markers, and  $\beta$  cell functional markers at the  $\beta$ -like stage (n=4).
- (C) Box and whisker plots of in vitro GSIS at  $\beta$  cell stage. Two-tailed ratio paired t test was used to calculate the significance of C-peptide secretion between 16.7 mM glucose and 2.8 mM glucose (n=6).
- (D) Immunostaining of CPEP and SST in grafts collected from mouse kidney capsules at 4 months after transplantation.
- (E) *In vivo* GSIS at one month after transplantation. Blood samples were collected after an overnight fasting and 30 min post glucose injection, respectively. Human insulin was measured for each mouse transplanted with either WT or *GATA6*<sup>-/+</sup> cells.

All data in this figure were generated from H1 lines using the 2nd-generation differentiation protocol.

# Shi\_Supplementary Figure 5

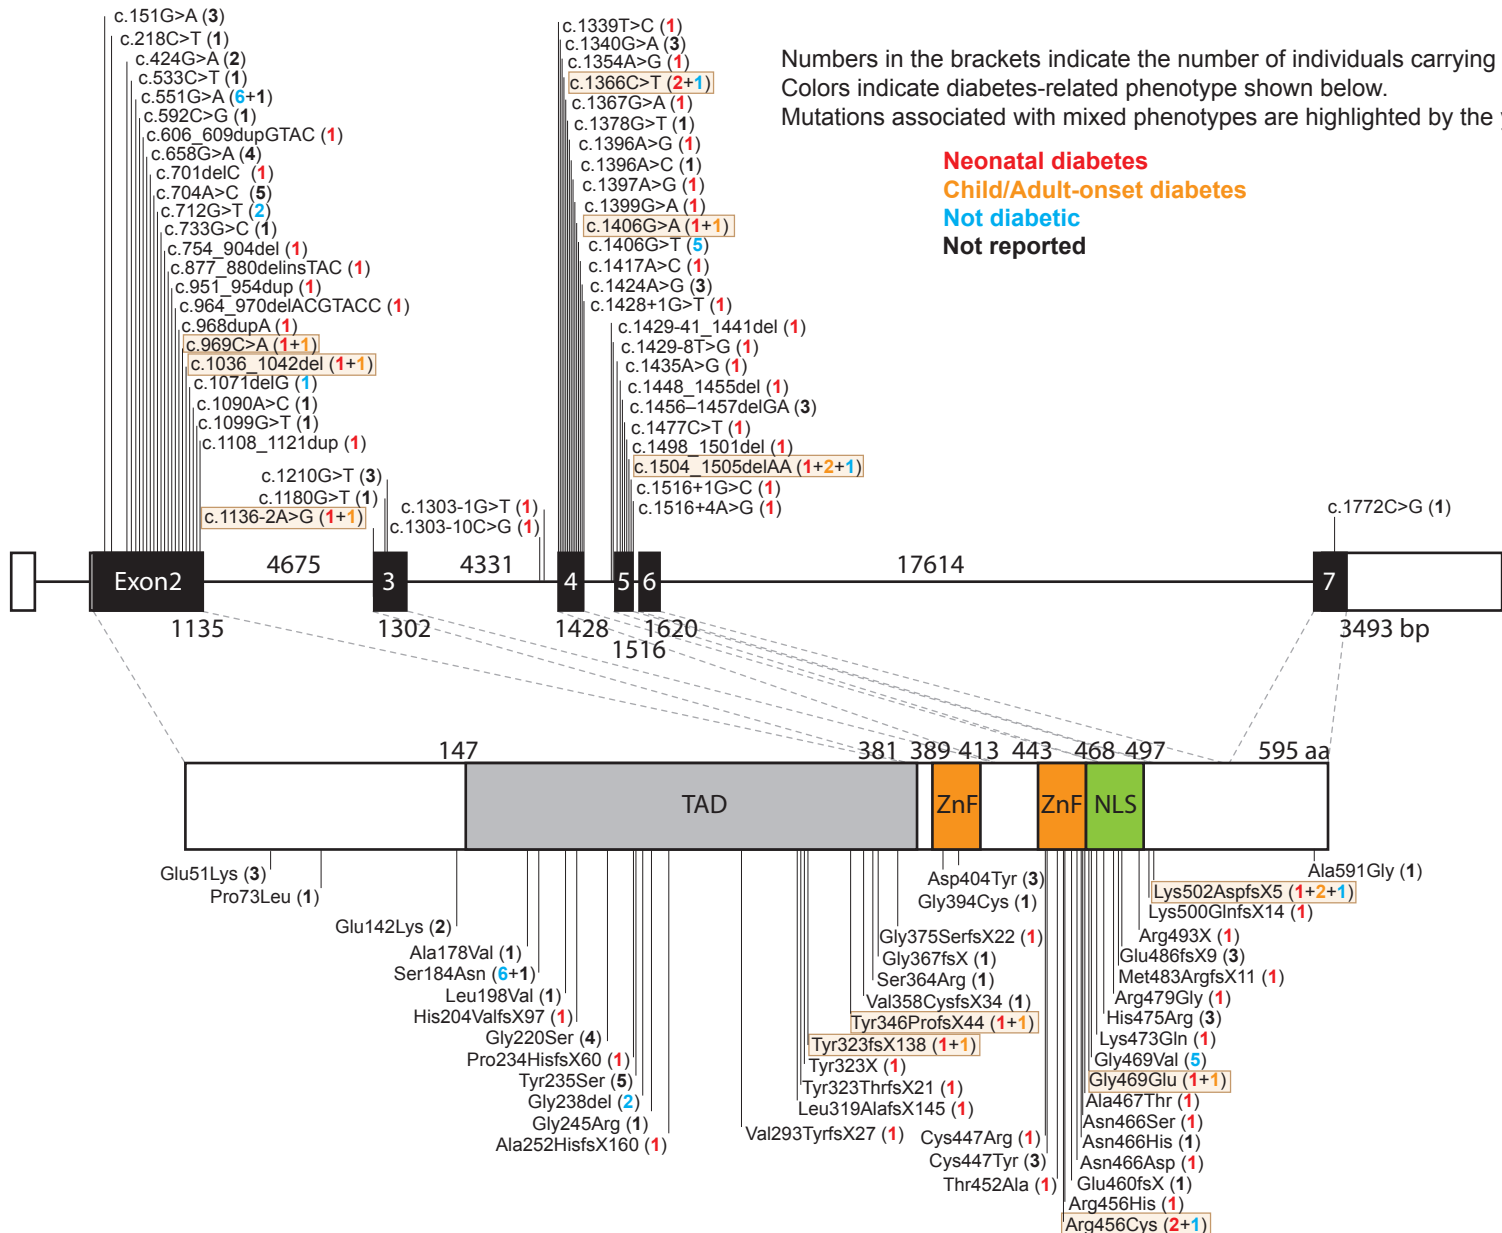

**Figure S5. *GATA6* heterozygous mutations in humans. Related to Figure 6.**

Both positions of gene and protein (if available) of the mutations are shown. Color-coded numbers in the brackets indicate number of cases with certain diabetes phenotypes.

Red indicates neonatal diabetes; Orange indicates child- or adult-onset diabetes; Blue indicates not diabetic; and Black indicates pancreatic or diabetes-related phenotype was not reported. Mutations in the *GATA6* promoter region were excluded. Cases with mosaic mutation were also excluded. Yellow boxes indicate mixed phenotypes associated with the mutation.

# Shi\_Supplementary Figure 6

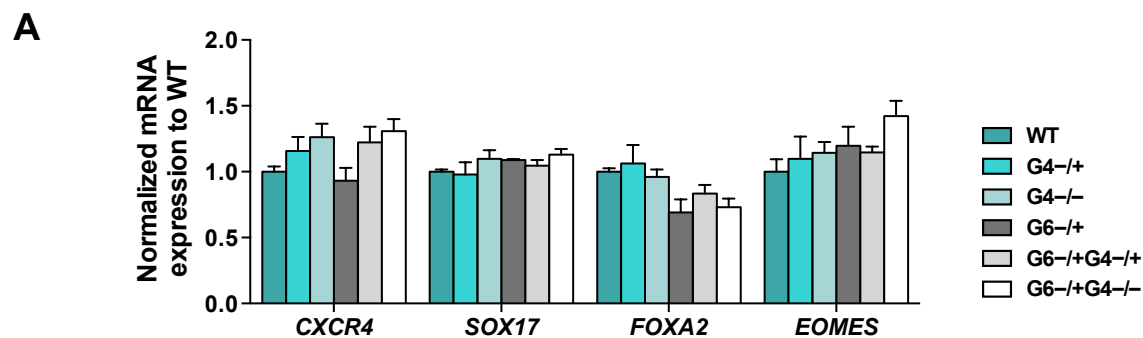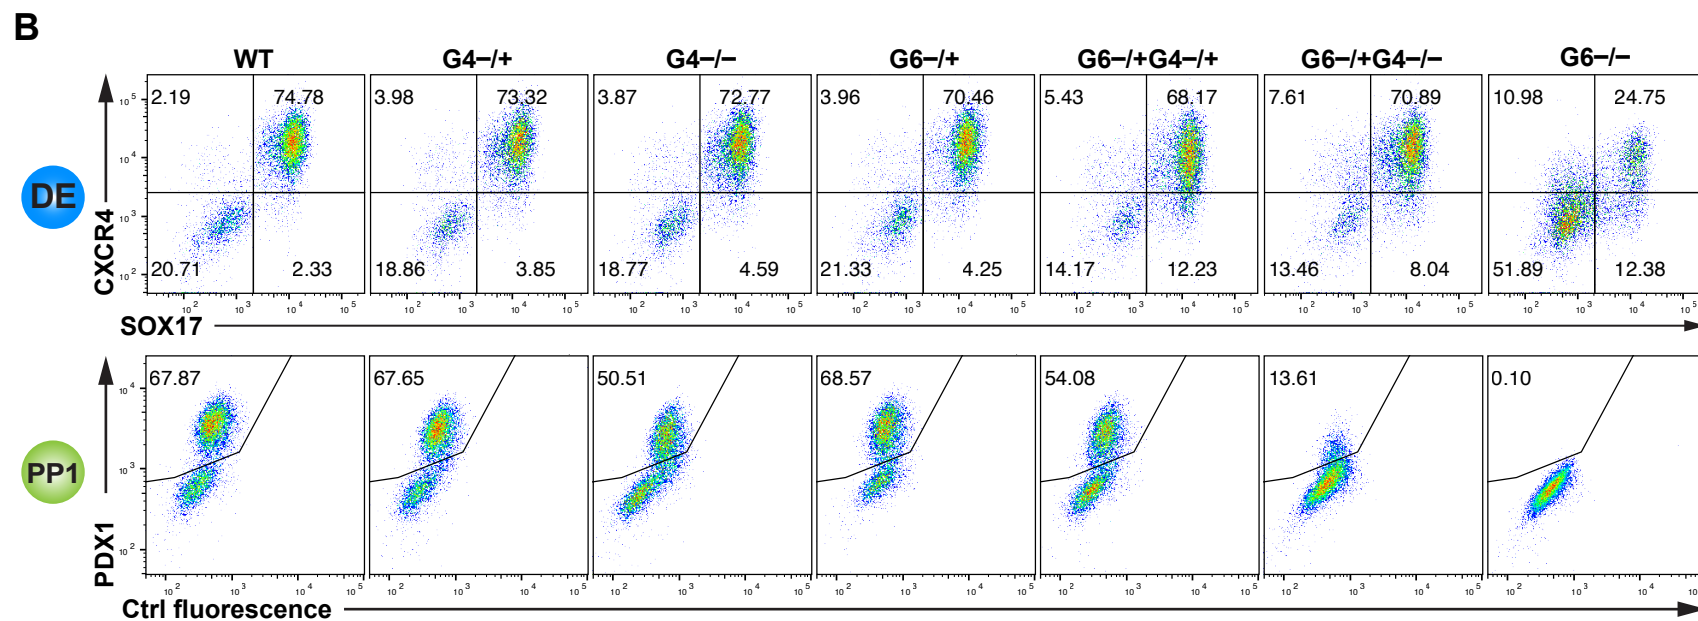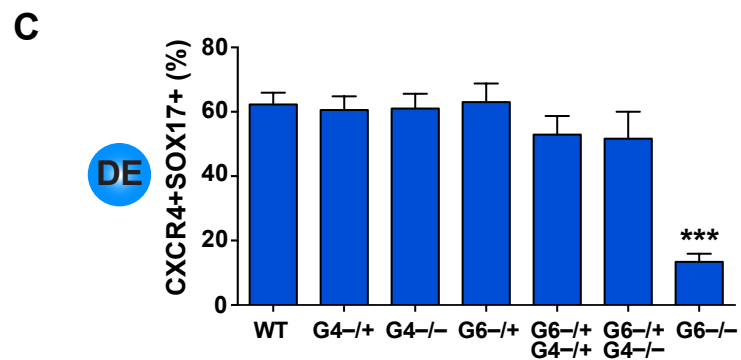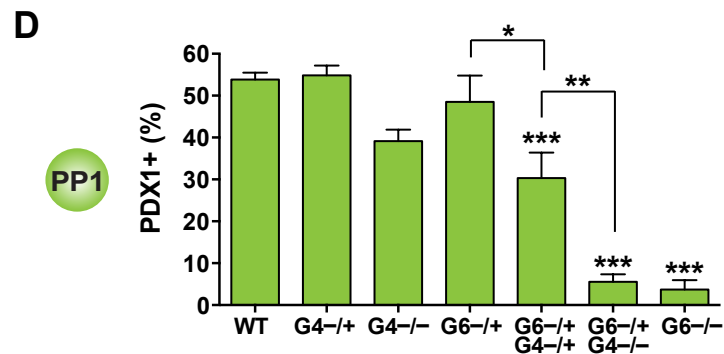

**Figure S6. Genetic interaction of *GATA4* and *GATA6* in the specification of definitive endoderm cells and pancreatic progenitors. Related to Figure 6.**

- (A) RT-qPCR for DE marker mRNA expression in *GATA6/4* mutants (n=4) using the 2nd-generation protocol.
- (B) Representative FACS dot plots of various GATA mutants at DE stage (d5) stained for CXCR4 and SOX17 and PP1 stage stained for PDX1 using the 1st-generation protocol.
- (C) FACS quantification of DE differentiation efficiency for individual GATA mutant lines using the 1st-generation protocol (n=6-12).
- (D) FACS quantification of PP1 differentiation efficiency for individual GATA mutant lines using the 1st-generation protocol (n=6-12).

All data in this figure were generated from HUES8 lines.

**Table S1. Summary of CRISPR targeting sequences and oligonucleotides used for targeting experiments. Related to Figure 2.**

**CRISPR gRNA target sequences for targeting *GATA6* and *GATA4***

| Gene         | CRISPR | gRNA target sequence (5' of PAM) |
|--------------|--------|----------------------------------|
| <i>GATA6</i> | G6-Cr1 | GGCGTTTCTGCGCCATAAGG             |
|              | G6-Cr2 | TTATGGCGCAGAAACGCCG              |
| <i>GATA4</i> | G4-Cr1 | GGGGTGTAAGCGGCTCCGT              |
|              | G4-Cr2 | AGGAGAAGCGCGGCGACAC              |

**PCR and sequencing primers used for genotyping and sequencing**

| Gene         | Primer     | Sequence (5' to 3')     |
|--------------|------------|-------------------------|
| <i>GATA6</i> | Forward    | ACATACTTGTGATGACAGGGACA |
|              | Reverse    | CGTTTGCAATAGTTCAACTGG   |
|              | Sequencing | CGTTTGCAATAGTTCAACTGG   |
| <i>GATA4</i> | Forward    | TCGTTGTTGCCGTCGTTTTTC   |
|              | Reverse    | CGTCGGCCATGTAAGC        |
|              | Sequencing | GCCAGTCTACGTGCCCACACC   |

**PCR and sequencing primers used for off-target analysis**

| Gene            | Primer     | Sequence (5' to 3')   |
|-----------------|------------|-----------------------|
| <i>NCOR1</i>    | Forward    | AACACCAAGCTTCAGTCAGC  |
|                 | Reverse    | TGAGCTCTTGGTCCATGAGAC |
|                 | Sequencing | TGAGCTCTTGGTCCATGAGAC |
| <i>SNX29</i>    | Forward    | GCACAGACCGTAGAGTCGAG  |
|                 | Reverse    | GTGGTCCCAGGAATCCAAGG  |
|                 | Sequencing | ATGACAGCAACTCCCCGAAG  |
| <i>AHNAK</i>    | Forward    | CTCCCCCACCCTCCATTTTC  |
|                 | Reverse    | GTGAACTCCAGGCACCTGAT  |
|                 | Sequencing | GACCTGAAAGGCCCAAGT    |
| <i>RBM20</i>    | Forward    | AAGCTGGAACCGAGCCAAAT  |
|                 | Reverse    | GTCATCTCCGTTGTCCCTCC  |
|                 | Sequencing | CTGGCATAGGGAGAGTGCTC  |
| <i>C20orf85</i> | Forward    | GTCTGGAGGTTTCCCCAAGG  |
|                 | Reverse    | GGACATGAGAGCGACAGGAG  |
|                 | Sequencing | CCCAGACGTGAGCAAAGGAT  |

**Sequences of ssDNA donor for HDR**

| CRISPR                       | Genotype designation | Sequence (5' to 3')                                                                                                 |
|------------------------------|----------------------|---------------------------------------------------------------------------------------------------------------------|
| <i>GATA6</i> -<br><i>Cr2</i> | WT reference         | GGATTGTCCTGTGCCAACTGTCACACCACAACCTACCACCTTATGGCGCAGAAACG<br>CCGAGGGTGAACCCGTGTGCAATGCTTGTGGACTCTACATGAAACTCCATGGGGT |
|                              | c.1366C>T donor      | GGATTGTCCTGTGCCAACTGTCACACCACAACCTACCACCTTATGGTGCAGAAACG<br>CCGAAGGTGAACCCGTGTGCAATGCTTGTGGACTCTACATGAAACTCCATGGGGT |

The underlined sequence indicates CRISPR target sequence; nucleotide base **T** in red color is the c.1366C>T mutation and orange **A** is a silent mutation in the PAM sequence.

**Table S2. Summary of *GATA6/4* mutant lines investigated. Related to Figures 2-6.**

| HUES8 hESC clonal lines |            |                      |                   |                      |                      |
|-------------------------|------------|----------------------|-------------------|----------------------|----------------------|
| Gene                    | Clone name | Genotype designation | CRISPR            | Predicted protein    |                      |
| <b>GATA6</b>            |            | <b>G6</b>            |                   | <b>GATA6 alleles</b> |                      |
|                         | wt1        | WT                   | G6-Cr2            | +/+                  |                      |
|                         | wt3        | WT                   | G6-Cr2            | +/+                  |                      |
|                         | m32        | -/+                  | G6-Cr2            | E460fs/+             |                      |
|                         | m33        | -/+                  | G6-Cr2            | N458fs/+             |                      |
|                         | m23        | -/-                  | G6-Cr2            | E460fs/E460fs        |                      |
|                         | m36        | -/-                  | G6-Cr2            | N458fs/N458fs        |                      |
|                         | m37        | -/-                  | G6-Cr2            | N458fs/N458fs        |                      |
|                         | m38        | R456C/+              | G6-Cr2            | R456C/+              |                      |
|                         | m40        | R456C/+              | G6-Cr2            | R456C/+              |                      |
|                         | m34        | R456C/R456C          | G6-Cr2            | R456C/R456C          |                      |
|                         | m35        | R456C/R456C          | G6-Cr2            | R456C/R456C          |                      |
|                         | wt4        | WT                   | G6-Cr1            | +/+                  |                      |
|                         | wt5        | WT                   | G6-Cr1            | +/+                  |                      |
|                         | m42        | -/+                  | G6-Cr1            | L454fs/+             |                      |
|                         | m44        | -/-                  | G6-Cr1            | L454fs/+             |                      |
|                         | m45        | -/-                  | G6-Cr1            | T452fs/T452fs        |                      |
|                         | m46        | -/-                  | G6-Cr1            | T451fs/T451fs        |                      |
|                         | m47        | -/-                  | G6-Cr1            | L454fs/L454fs        |                      |
|                         |            |                      |                   |                      |                      |
| <b>GATA4</b>            |            | <b>G4</b>            |                   | <b>GATA4 alleles</b> |                      |
|                         | wt8        | WT                   | G4-Cr1            | +/+                  |                      |
|                         | wt9        | WT                   | G4-Cr1            | +/+                  |                      |
|                         | wt10       | WT                   | G4-Cr1            | +/+                  |                      |
|                         | m96        | -/+                  | G4-Cr1            | D95fs/+              |                      |
|                         | m97        | -/+                  | G4-Cr1            | A97fs/+              |                      |
|                         | m98        | -/+                  | G4-Cr1            | A97fs/+              |                      |
|                         | m99        | -/+                  | G4-Cr1            | D95fs/+              |                      |
|                         | m104       | -/-                  | G4-Cr1            | A97fs/A97fs          |                      |
|                         | m105       | -/-                  | G4-Cr1            | P87fs/P87fs          |                      |
|                         | m5         | -/-                  | G4-Cr2            | V104fs/V104fs        |                      |
|                         | m6         | -/-                  | G4-Cr2            | G96fs/G96fs          |                      |
|                         |            |                      |                   |                      |                      |
| <b>GATA6;<br/>GATA4</b> |            | <b>G6;G4</b>         |                   | <b>GATA6 alleles</b> | <b>GATA4 alleles</b> |
|                         | m106       | -/+;-/+              | G6-Cr2;<br>G4-Cr1 | N458fs/+             | D95fs/+              |
|                         | m107       | -/+;-/+              | G6-Cr2;<br>G4-Cr1 | N458fs/+             | A94fs/+              |
|                         | m108       | -/+;-/+              | G6-Cr2;<br>G4-Cr1 | N458fs/+             | Q91fs/+              |
|                         | m109       | -/+;-/+              | G6-Cr2;<br>G4-Cr1 | N458fs/+             | G96fs/+              |
|                         | m110       | -/+;-/-              | G6-Cr2;<br>G4-Cr1 | N458fs/+             | D95fs/G96fs          |
|                         | m111       | -/+;-/-              | G6-Cr2;<br>G4-Cr1 | N458fs/+             | G93fs/Q91fs          |

| H1 hESC clonal lines |            |                      |        |                   |
|----------------------|------------|----------------------|--------|-------------------|
| Gene                 | Clone name | Genotype designation | CRISPR | Predicted protein |
| <b>GATA6</b>         | w2         | WT                   | G6-Cr1 | +/+               |
|                      | w4         | WT                   | G6-Cr2 | +/+               |
|                      | m2         | -/+                  | G6-Cr1 | L454fs/+          |
|                      | m5         | -/+                  | G6-Cr2 | R457fs/+          |
|                      | m11        | -/-                  | G6-Cr1 | L454fs/ L454fs    |
|                      | m14        | -/-                  | G6-Cr2 | N458fs/N458fs     |
|                      | pw1        | WT                   | G6-Cr2 | +/+               |
|                      | pw2        | WT                   | G6-Cr2 | +/+               |
|                      | pm1        | R456C/+              | G6-Cr2 | R456C/+           |
|                      | pm2        | R456C/+              | G6-Cr2 | R456C/+           |

Note: Mutant alleles are described according to the predicted changes at the protein level following the Human Genome Variation Society (HGVS) guidelines (<http://www.hgvs.org/mutnomen>). In brief, the first amino acid affected and its position is described. Following that, “fs” indicates a frame-shift change; and an amino acid code indicates a substitution. Some frameshift mutant alleles share the same description, but the length of the amino acids from the frame-shift to the new stop codon may be different.

**Table S3. hPSC differentiation into glucose-responsive  $\beta$ -like cells. Related to Figures 4-6.**

**The 2nd generation differentiation protocol**

| Stage   | Day        | Media                                                                                                                                                                                                                                                                                                                                                                                                                                                                                                                                       | Supplement             |                      |                   |                 |               |                |                |                     |
|---------|------------|---------------------------------------------------------------------------------------------------------------------------------------------------------------------------------------------------------------------------------------------------------------------------------------------------------------------------------------------------------------------------------------------------------------------------------------------------------------------------------------------------------------------------------------------|------------------------|----------------------|-------------------|-----------------|---------------|----------------|----------------|---------------------|
| S0 (2d) | d-2<br>d-1 | Seeded 75,000 hPSCs/cm <sup>2</sup> on vitronectin-coated plates in E8 media with 5 uM Y-27632.<br>Changed media.                                                                                                                                                                                                                                                                                                                                                                                                                           |                        |                      |                   |                 |               |                |                |                     |
| S1 (3d) | d0         | Began differentiation when the cells reached ~75% confluency (~48 hr after seeding).<br>Rinsed cells with DPBS (w/o Ca <sup>2+</sup> , Mg <sup>2+</sup> ) for 5 min and added differentiation media (see below).                                                                                                                                                                                                                                                                                                                            |                        |                      |                   |                 |               |                |                |                     |
|         | d0         | S1-2                                                                                                                                                                                                                                                                                                                                                                                                                                                                                                                                        | Activin A<br>100 ng/ml | CHIR-99021<br>5 uM   |                   |                 |               |                |                |                     |
|         | d1         | S1-2                                                                                                                                                                                                                                                                                                                                                                                                                                                                                                                                        | Activin A<br>100 ng/ml | CHIR-99021<br>0.3 uM |                   |                 |               |                |                |                     |
|         | d2         | S1-2                                                                                                                                                                                                                                                                                                                                                                                                                                                                                                                                        | Activin A<br>100 ng/ml |                      |                   |                 |               |                |                |                     |
|         | d3         | >80% DE cells expressing endoderm markers including CXCR4, SOX17 and FOXA2.                                                                                                                                                                                                                                                                                                                                                                                                                                                                 |                        |                      |                   |                 |               |                |                |                     |
| S2 (2d) | d3-4       | Briefly rinsed cells with 1X DPBS (w/o Ca <sup>2+</sup> , Mg <sup>2+</sup> ).                                                                                                                                                                                                                                                                                                                                                                                                                                                               |                        |                      |                   |                 |               |                |                |                     |
|         |            | S1-2                                                                                                                                                                                                                                                                                                                                                                                                                                                                                                                                        | Vitamin C<br>0.25 mM   | FGF7<br>50 ng/ml     | IWP-2<br>1.25 uM  |                 |               |                |                |                     |
| S3 (2d) | d5-6       | S3-4                                                                                                                                                                                                                                                                                                                                                                                                                                                                                                                                        | Vitamin C<br>0.25 mM   | FGF7<br>50 ng/ml     | SANT-1<br>0.25 uM | RA<br>1 uM      | LDN<br>100 nM | ITS-X<br>1:200 | TPB<br>200 nM  |                     |
| S4 (3d) | d7-9       | S3-4                                                                                                                                                                                                                                                                                                                                                                                                                                                                                                                                        | Vitamin C<br>0.25 mM   | FGF7<br>2 ng/ml      | SANT-1<br>0.25 uM | RA<br>0.1 uM    | LDN<br>200 nM | ITS-X<br>1:200 | TPB<br>100 nM  |                     |
|         | d10        | Cells were examined for expression of pancreatic progenitor markers including PDX1 and NKX6.1.                                                                                                                                                                                                                                                                                                                                                                                                                                              |                        |                      |                   |                 |               |                |                |                     |
| S5 (3d) | d10        | S4 cells were treated with 10 uM Y-27632 for 4 hr, collected using TrypLE and washed with basal MCDB 131 media. Cell pellets were re-suspended in S5-7 media with S5 chemical supplements at ~50 million/ml and spotted onto transwell insert filters (6-well plate: Corning 3414; 10cm plate: Corning 3420) for culture in air-liquid interface at ~7.5 ul/spot and ~10 spots per 6-well or ~100 spots per 10cm plate.<br>S5-7 media with supplements were added to the bottom of each insert: ~1.5 ml per 6-well or ~8 ml per 10cm plate. |                        |                      |                   |                 |               |                |                |                     |
|         | d10-12     | S5-7                                                                                                                                                                                                                                                                                                                                                                                                                                                                                                                                        | T3<br>1 uM             | Alk5i II<br>10 uM    | SANT-1<br>0.25 uM | RA<br>0.05 uM   | LDN<br>100 nM | ITS-X<br>1:200 | ZnSO4<br>10 uM | Heparin<br>10 ug/ml |
| S6 (7d) | d13-19     | S5-7                                                                                                                                                                                                                                                                                                                                                                                                                                                                                                                                        | T3<br>1 uM             | Alk5i II<br>10 uM    | GSiXX<br>100 nM   | LDN<br>100 nM   |               | ITS-X<br>1:200 | ZnSO4<br>10 uM | Heparin<br>10 ug/ml |
|         |            |                                                                                                                                                                                                                                                                                                                                                                                                                                                                                                                                             |                        |                      |                   |                 |               |                |                |                     |
| S7 (2w) | d20-33     | S5-7                                                                                                                                                                                                                                                                                                                                                                                                                                                                                                                                        | T3<br>1 uM             | Alk5i II<br>10 uM    | N-Cys<br>1 mM     | Trolox<br>10 uM | R428<br>2 uM  | ITS-X<br>1:200 | ZnSO4<br>10 uM | Heparin<br>10 ug/ml |

Change media every day as indicated.

**Media**

| Media Stage | Media component (add corresponding supplements listed above) |                |             |                   |                  |
|-------------|--------------------------------------------------------------|----------------|-------------|-------------------|------------------|
| S1-2        | MCDB 131                                                     | GlutaMAX<br>1X | BSA<br>0.5% | NaHCO3<br>1.5 g/L | Glucose<br>10 mM |
| S3-4        | MCDB 131                                                     | GlutaMAX<br>1X | BSA<br>2%   | NaHCO3<br>2.5 g/L | Glucose<br>10 mM |
| S5-7        | MCDB 131                                                     | GlutaMAX<br>1X | BSA<br>2%   | NaHCO3<br>1.5 g/L | Glucose<br>20 mM |

**Chemicals and media components**

| Components                                        | Vendor                          | Cat. No.    |
|---------------------------------------------------|---------------------------------|-------------|
| MCDB 131                                          | GIBCO                           | 10372-019   |
| GlutaMAX                                          | GIBCO                           | 35050-061   |
| NaHCO3                                            | Fisher Scientific               | 144-55-8    |
| D-Glucose                                         | Sigma-Aldrich                   | G8769       |
| BSA (bovine serum albumin)                        | LAMPIRE Biological Laboratories | 7500855     |
| Activin A                                         | PeproTech                       | 120-14E     |
| CHIR-99021, GSK-3 inhibitor                       | Stemgent                        | 04-0004     |
| L-Ascorbic acid (vitamin C)                       | Sigma-Aldrich                   | A4544       |
| FGF7 (KGF)                                        | R&D                             | 251-KG      |
| SANT-1, Hedgehog inhibitor                        | Sigma                           | S4572       |
| RA (retinoic acid)                                | Sigma                           | R2625       |
| LDN, BMP inhibitor                                | Stemgent                        | 04-0019     |
| ITS-X (insulin-transferrin-selenium-ethanolamine) | GIBCO                           | 51500-056   |
| TPB, Protein kinase C (PKC) activator             | EMD Millipore                   | 565740      |
| T3 (3,3',5-Triiodo-L-thyronine)                   | Sigma-Aldrich                   | T6397       |
| ALK5i II (ALK5 inhibitor II)                      | Enzo Life Sciences              | ALX-270-445 |
| ZnSO4                                             | Sigma-Aldrich                   | Z0251       |
| Heparin                                           | Sigma-Aldrich                   | H3149       |
| GSiXX (gamma secretase inhibitor XX)              | EMD Millipore                   | 565789      |
| N-Cys (N-acetyl cysteine)                         | Sigma-Aldrich                   | A9165       |
| Trolox, vitamin E analogue                        | EMD Millipore                   | 648471      |
| R428, AXL receptor tyrosine kinase inhibitor      | Selleck Chemicals               | S2841       |
| IWP-2, Wnt antagonist                             | Tocris Bioscience               | 3533        |

**Table S4. *GATA6* heterozygous mutations reported in humans. Related to Figure 6.**

Available as a separate spreadsheet.

**Table S5. Primers for qRT-PCR. Related to Figures 1, 4.**

| <b>Gene</b>    | <b>Forward (5' to 3')</b>   | <b>Reverse (5' to 3')</b>  |
|----------------|-----------------------------|----------------------------|
| <b>ACTB</b>    | CATGTACGTTGCTATCCAGGC       | CTCCTTAATGTCACGCACGAT      |
| <b>EOMES</b>   | CGGCCTCTGTGGCTCAA           | AAGGAAACATGCGCCTGC         |
| <b>GATA6</b>   | TCTCCATGTGCATTGGGGAC        | AAGGAAATCGCCCTGTTCTGT      |
| <b>GATA4</b>   | AAAGAGGGGATCCAAACCAG        | TTGCTGGAGTTGCTGGAAG        |
| <b>FOXA2</b>   | GGGAGCGGTGAAGATGGA          | TCATGTTGCTCACGGAGGAGTA     |
| <b>SOX17</b>   | GGCGCAGCAGAATCCAGA          | CCACGACTTGCCCAGCAT         |
| <b>CXCR4</b>   | CACCGCATCTGGAGAACCA         | GCCCATTTCTCTCGGTGTAGTT     |
| <b>PDX1</b>    | TGGAGCTGGCTGTCATGTTGA       | CGCTTCTTGTTCCTCCTCCTTTT    |
| <b>SOX9</b>    | AGCTCTGGAGACTTCTGAACGAGAG   | CGTTCTTCACCGACTTCCTCCGC    |
| <b>HNF6</b>    | CGCTCCGCTTAGCAGCAT          | GTGTTGCCTCTATCCTTCCCAT     |
| <b>HNF1A</b>   | GGTCCTACGTTACCAACACA        | CTCTGGGTCACATGGCTCT        |
| <b>HNF1B</b>   | TCACAGATACCAGCAGCATCAGT     | GGGCATCACCAGGCTTGTA        |
| <b>HNF4A</b>   | CATGGCCAAGATTGACAACCT       | TTCCCATATGTTCTGTCATCAG     |
| <b>MNX1</b>    | TCCACCGCGGGCATGATCCT        | GCGCTTGGGCCGCGACAGGTA      |
| <b>PROX1</b>   | AAAGCAAAGCTCATGTTTTTTTATACC | GTAAAACTCACGGAAATTGCTAAACC |
| <b>PTF1A</b>   | CCAGAAGGTCATCATCTGCC        | AGAGAGTGTCTGCTAGGGG        |
| <b>NKX6.1</b>  | CTGGCCTGTACCCCTCATCA        | CTTCCCGTCTTTGTCCAACAA      |
| <b>NGN3</b>    | CTATTCTTTTGGCCCGGTAG        | ACTTCGTCTTCCGAGGCTCT       |
| <b>NEUROD1</b> | GGATGACGATCAAAAGCCCAA       | GCGTCTTAGAATAGCAAGGCA      |
| <b>NKX2.2</b>  | ATGTAAACGTTCTGACAACCT       | TTCCATATTTGAGAAAATGTTTGC   |
| <b>MAFA</b>    | TTCAGCAAGGAGGAGGTCAT        | CGCCAGCTTCTCGTATTTCT       |
| <b>MAFB</b>    | TCAAGTTCGACGTGAAGAAGG       | GTTTCATCTGCTGGTAGTTGCT     |
| <b>ISL1</b>    | TTCCCTATGTGTTGGTTGCGGC      | CGCATTTGATCCCGTACAACCTGA   |
| <b>PAX6</b>    | AGACATCCGAGATTTTCAAGCCCCA   | GGCCGCCCCGTTGACAAAGAC      |
| <b>INS</b>     | CCCTGCAGAAGCGTGGCATT        | CCATCTCTCTCGGTGCAGGA       |
| <b>GCG</b>     | AAGCATTTACTTTGTGGCTGGATT    | TGATCTGGATTTCCTCTGTGTCT    |
| <b>SST</b>     | GATGCTGTCCTGCCGCCTCC        | TGCCATAGCCGGGTTTGA         |
| <b>GHRL</b>    | TGAACACCAGAGAGTCCAGCA       | GCTTGGCTGGTGGCTTCTT        |
| <b>ABCC8</b>   | CTGCTAAACCGGATCATCCTAGCC    | CGAGGAACACAGGTGTGACATAGG   |
| <b>GCK</b>     | TGCAGATGCTGGACGACAG         | GAACCTCTGCCAGGATCTGCTCTA   |
